# Supplementary material for: A mild solution strategy for the synthesis of mesoporous CeO2 nanoflowers derived from Ce(HCOO)3
Source: Royal Society of Chemistry journal article supplement (doi:10.1039/c1ce05324h), 2011-01-01
Supplement: c1ce05324h.pdf [file c1ce05324h.pdf]

## A Mild Solution Strategy for the Synthesis of Mesoporous CeO<sub>2</sub> Nanoflowers Derived from Ce(HCOO)<sub>3</sub>

Jingjing Wei, Zhijie Yang, Hongxiao Yang, Tao Sun and Yanzhao Yang\*

Key Laboratory for Special Functional Aggregate Materials of Education Ministry, School of

Chemistry and Chemical Engineering, Shandong University, Jinan 250100, P. R. China.

Tel: 0086-531-88365431; Fax: 0086-531-88564464

E-mail: [yzhyang@sdu.edu.cn](mailto:yzhyang@sdu.edu.cn) (Prof. Yanzhao Yang)

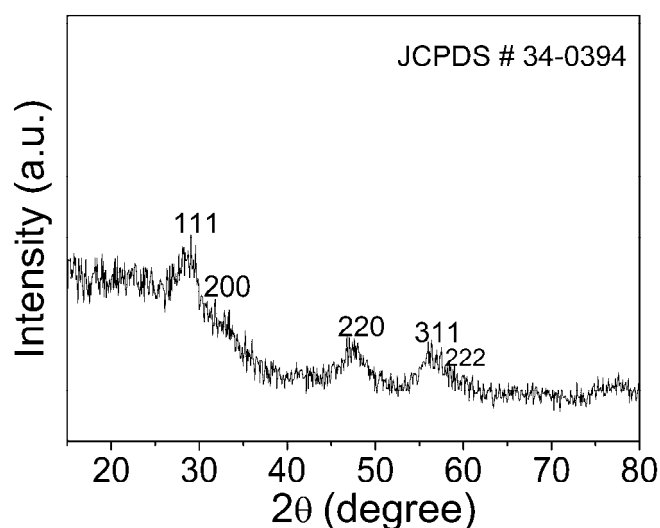

**Fig. S1** XRD pattern of the product obtained by aging the solution at room temperature for 10 days.

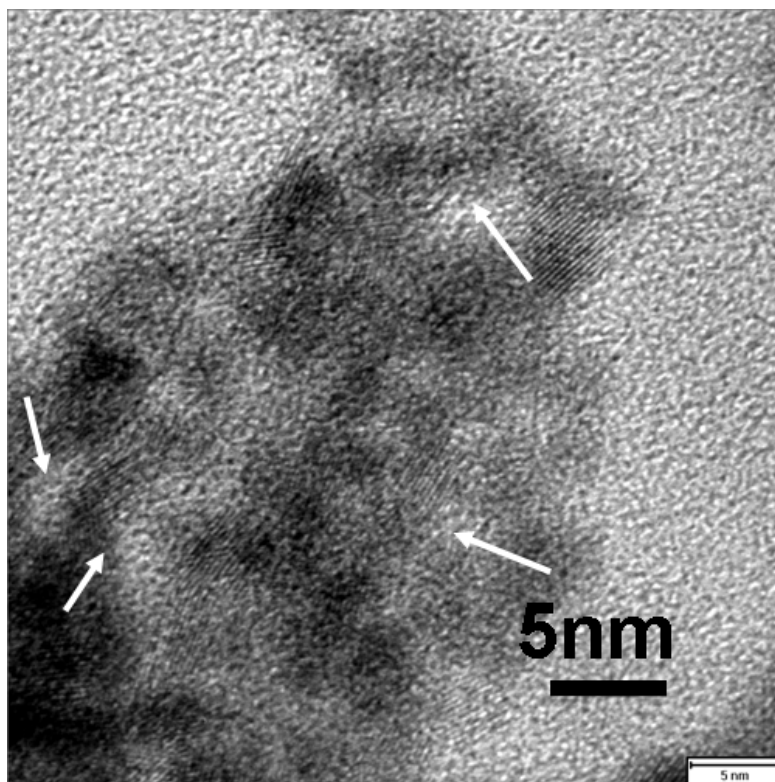

**Fig. S2** HRTEM image of one branch of the CeO<sub>2</sub> nanoflower. The nanopores were indicated by the white arrows.

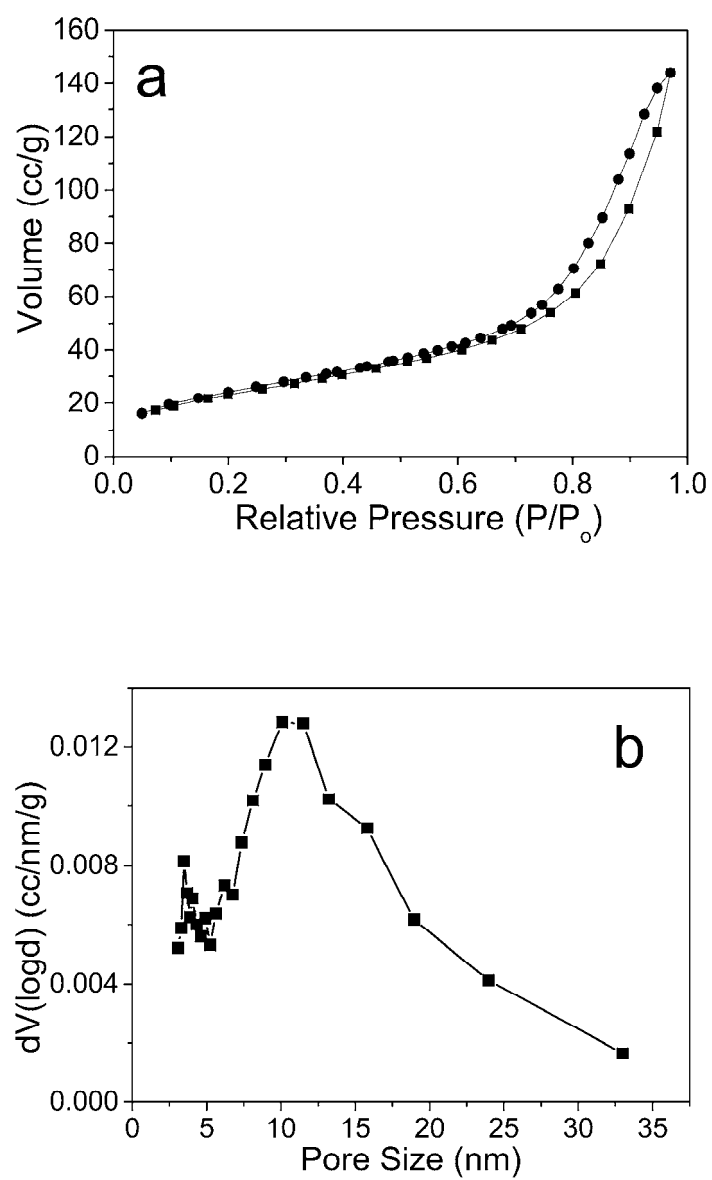

**Fig. S3** (a) N<sub>2</sub> adsorption-desorption isotherms of the CeO<sub>2</sub> spherical-like structures and (b) is the corresponding BJH pore size distribution curve

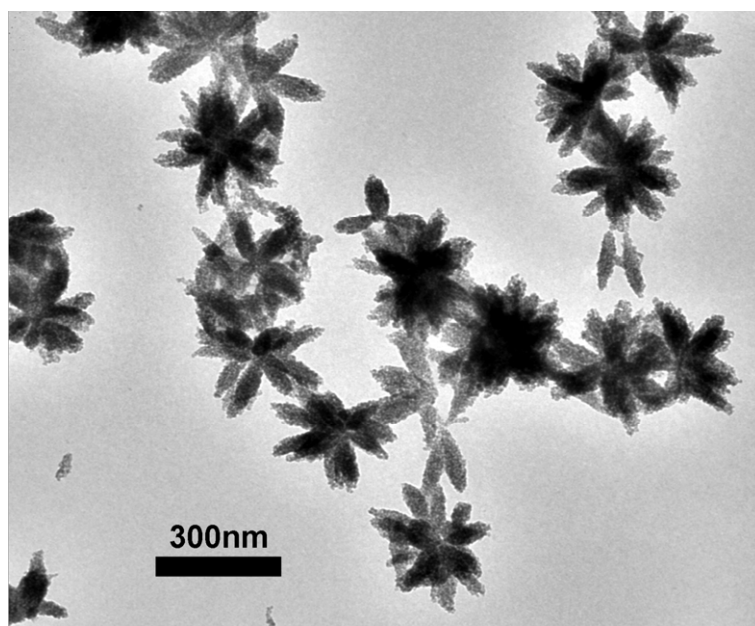

**Fig. S4** TEM image of the CeO<sub>2</sub> flower-like structures obtained after the catalytic measurement
